# Supplementary material for: Vertical cobalt dendrite array films: electrochemical deposition and characterization, glucose oxidation and magnetic properties
Source: Royal Society of Chemistry journal article supplement (doi:10.1039/c2jm30300k), 2012-01-01
Supplement: c2jm30300k.pdf [file c2jm30300k.pdf]

## Supplementary Information

### **Vertical cobalt dendrite array films: electrochemical deposition and characterization on glucose oxidation and magnetic properties**

Jin You Zheng,<sup>a</sup> Zhen Lan Quan,<sup>a</sup> Guang Song,<sup>a</sup> Chang Woo Kim,<sup>a</sup> Hyun Gil Cha,<sup>a</sup> Tae Wan Kim,<sup>a</sup> Woonsup Shin,<sup>a</sup> Kyu Joon Lee,<sup>b</sup> Myung Hwa Jung<sup>b</sup> and Young Soo Kang<sup>\*a</sup>

<sup>a</sup> *Korea Center of Artificial Photosynthesis, Department of Chemistry, Sogang University, Seoul 121-742, South Korea. Fax: (+82)-2-701-0967; E-mail: yskang@sogang.ac.kr*

<sup>b</sup> *Department of Physics, Sogang University, Seoul, South Korea.*

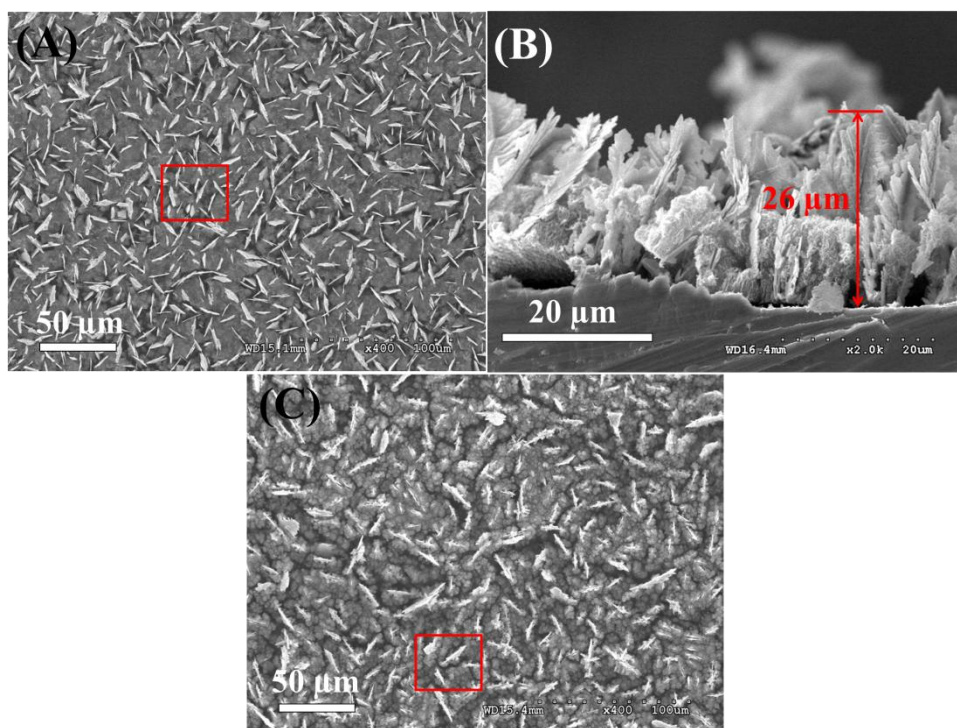

**Figure S1.** Low magnification SEM images of Co dendrites obtained at different applied potentials with initial pH = 5.6. Deposition condition: 0.05 M  $\text{Co}^{2+}$ , time: 600 s. (A) -1.2 V, (C) -1.3 V. (B) is the cross-sectional SEM image of (A).

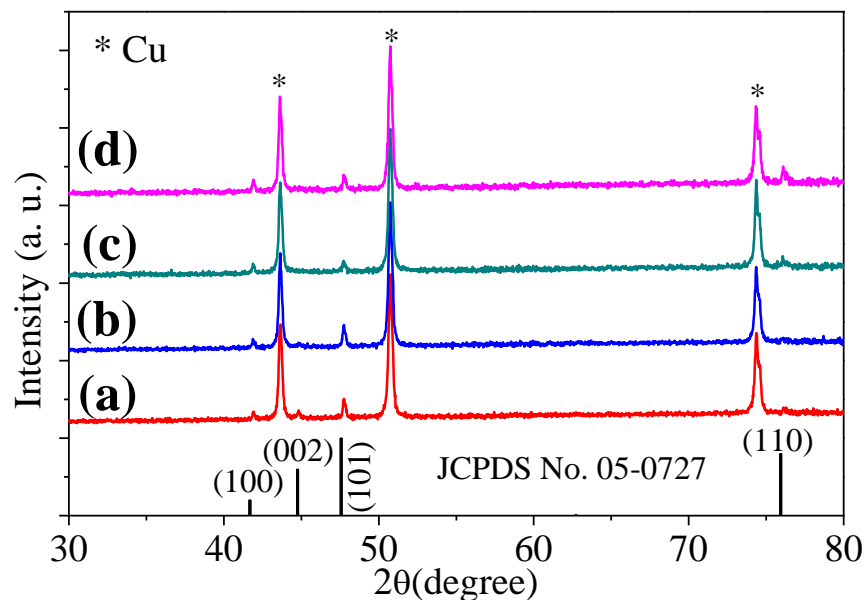

**Figure S2.** XRD patterns of Co dendrites films on Cu substrate (marked with asterisks) obtained at different applied potentials with initial pH = 5.6. Deposition condition: 0.05 M  $\text{Co}^{2+}$ , time: 600 s. (a) - 1.0 V, (b) -1.1 V, (c) -1.2 V, (d) -1.3 V.

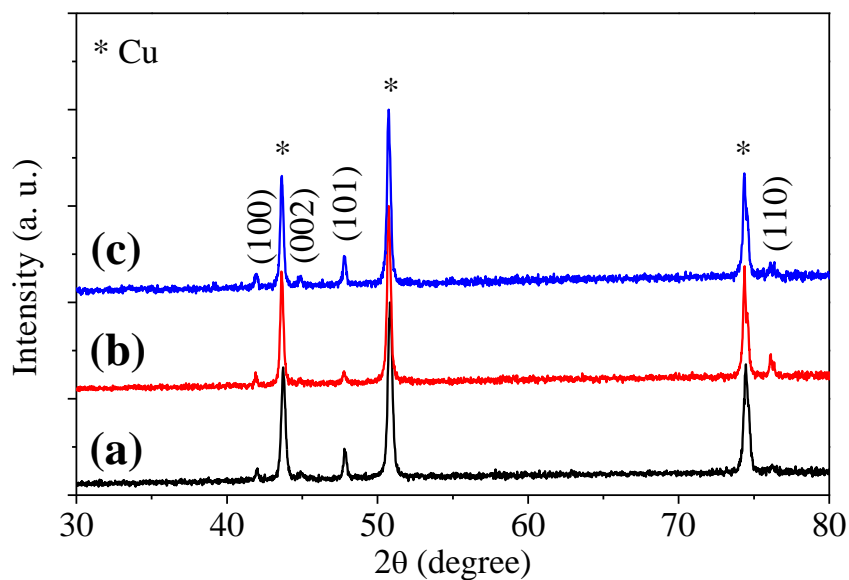

**Figure S3.** XRD patterns of Co dendrite obtained at pH = 7.5. Deposition condition: 0.05 M  $\text{Co}^{2+}$ , time: 600 s. (a) -1.1 V, (b) -1.2 V, (c) -1.3 V.

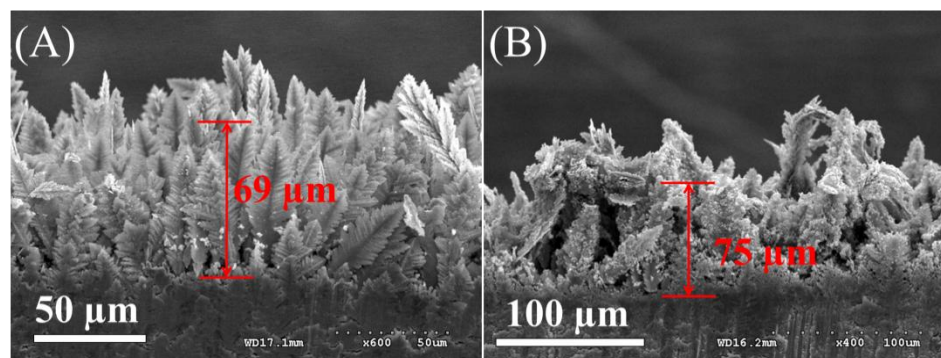

**Figure S4.** Cross-sectional SEM images of Co dendrite obtained at pH = 7.5. Deposition condition: 0.05 M  $\text{Co}^{2+}$ , time: 600 s. (A) -1.2 V; (B) -1.3 V.

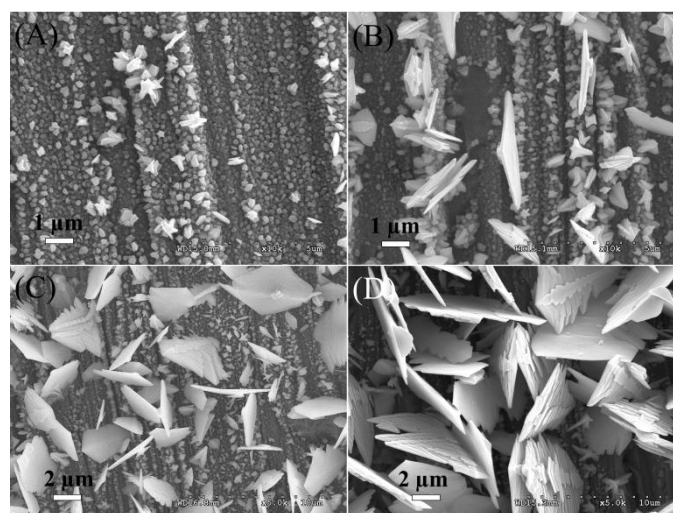

**Figure S5.** SEM images of Co dendrite films obtained in 0.05 M  $\text{Co}^{2+}$  solution at pH = 2.5 with potential -1.3 V for different time. (A) 100 s, (B) 200 s, (C) 300 s, (D) 600 s.
